# Supplementary material
Source: publisher site journal article supplement (https://www.spandidos-publications.com/3089/downloadSupplementary)

Figure S1. Verification of interference and overexpression of miR-1179 and TRIM37. (A and B) miR-1179 expression in MDA 231/DOC and MCF 7/DOC cells was assessed by reverse transcription quantitative PCR analysis. (C and D) TRIM37 mRNA expression in MDA 231/DOC and MCF 7/DOC cells was assessed using reverse transcription quantitative PCR analysis. \* $P < 0.05$  vs. respective NC. DOC, docetaxel; TRIM37, tripartite motif-containing protein 37; small interfering; NC, negative control; miR, microRNA.

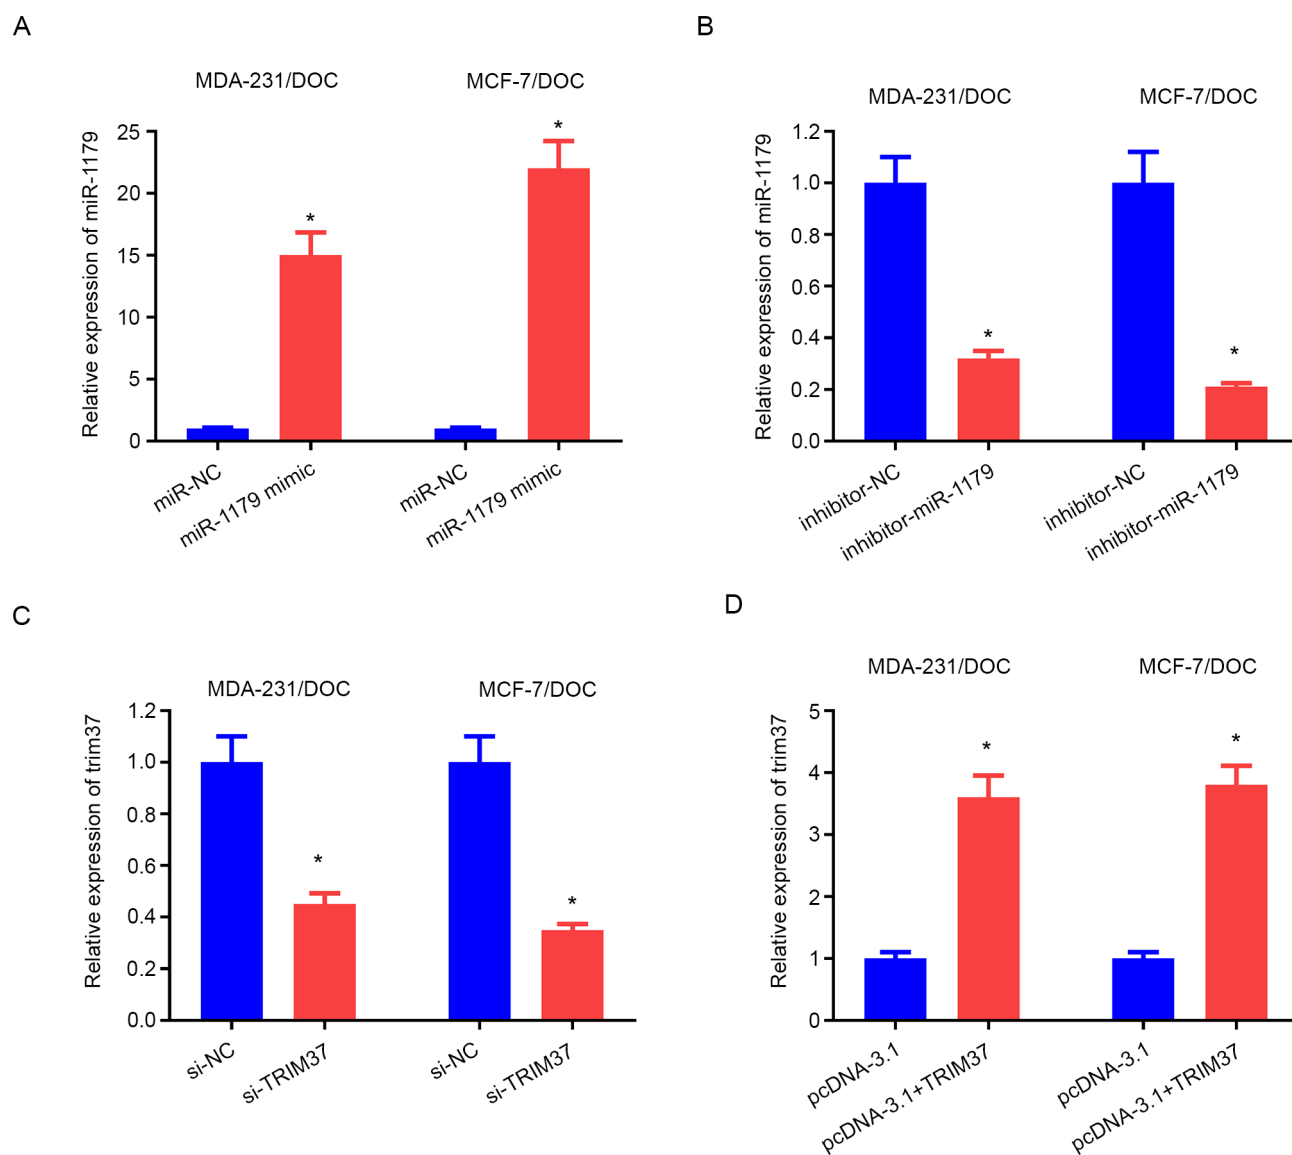

Supplement: Supplementary file 1 [file downloadSupplementary]
